# Supplementary material for: Scaffold-mediated switching of lymphoma metabolism in culture
Source: PubMed Central journal article supplement (PMC9559005; doi:10.1186/s40170-022-00291-y), 2022-10-12

Supplementary Figure S2

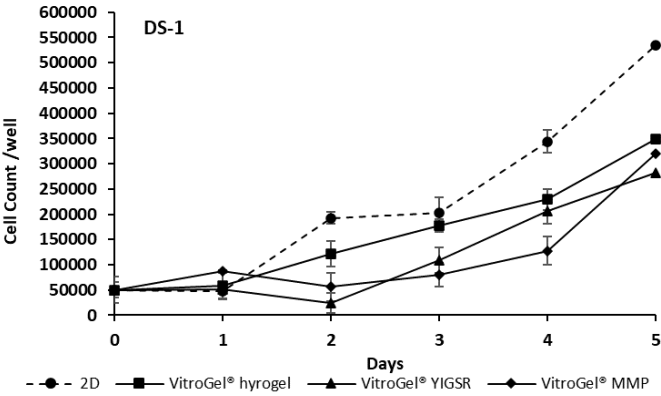

Supplement: 40170_2022_291_MOESM2_ESM.pdf [file 40170_2022_291_MOESM2_ESM.pdf]
